# Supplementary material for: Printed low-cost microfluidic analytical devices based on a transparent substrate
Source: Royal Society of Chemistry journal article supplement (doi:10.1039/c8an02304b), 2019-01-01
Supplement: c8an02304b2.pdf [file c8an02304b2.pdf]

Supplementary Information for

# Printed low-cost microfluidic analytical devices based on a transparent substrate

Shogo Fujisaki, Hiroyuki Shibata, Kentaro Yamada, Koji Suzuki and Daniel Citterio\*

Department of Applied Chemistry, Keio University  
3-14-1 Hiyoshi, Kohoku-ku, Yokohama 223-8522, Japan.

\*To whom correspondence should be addressed.

Tel: +81 45 566 1568; Fax: +81 45 566 1568; E-mail: [citterio@aplc.keio.ac.jp](mailto:citterio@aplc.keio.ac.jp)

## Table of Contents

|                                                                                                    |     |
|----------------------------------------------------------------------------------------------------|-----|
| Estimating the amount of nitroso-PSAP printed onto $\mu$ TFADs                                     | S3  |
| Experimental procedure for microplate well test identifying assay component mixing incompatibility | S4  |
| Figure S1 Schematic outline of 3D-printed inclination stand                                        | S5  |
| Figure S2 Optimization of the wax patterning of the sensing area                                   | S6  |
| Figure S3 Optimization of the wax dot printing opacity                                             | S7  |
| Figure S4 Absorbance spectra of OHP film spot tests                                                | S8  |
| Figure S5 Absorbance spectra obtained under different reagent pre-mixing conditions                | S9  |
| Figure S6 Iron concentration-dependent absorbance of acid red 52                                   | S10 |
| Experimental procedure for 96-well microplate $\text{Fe}^{2+}$ assay                               | S11 |
| Figure S7 $\text{Fe}^{2+}$ assay in 96-well microplate                                             | S12 |

|                                                                                     |     |
|-------------------------------------------------------------------------------------|-----|
| Figure S8 Response curves on filter paper spots in red and green colour coordinates | S13 |
| Figure S9 Original absorbance spectra of nitroso-PSAP complexes on $\mu$ TFADs      | S14 |
| Figure S10 Interference study of digital colour analysis on filter paper spots      | S15 |

### **The amount of nitroso-PSAP printed onto $\mu$ TFADs**

10 mM nitroso-PSAP was deposited in the form of a circle of 5.0 mm diameter using the black ink cartridge of the Canon iP2700 inkjet printer. Based on the calibrated printing volume (refer to reference 36 of the main text), a single printing cycle results in the deposition of approximately 1400 nL/cm<sup>2</sup>, corresponding to an amount of approximately 2.75 nmol of nitroso-PSAP in a 5.0 mm diameter spot. This colorimetric indicator is known to form 1:4 complexes with Fe<sup>2+</sup>. The formation of 1:4 complexes with 50  $\mu$ L of a 200  $\mu$ M Fe<sup>2+</sup>-sample (10 nmol Fe<sup>2+</sup>) requires 40 nmol of nitroso-PSAP printed onto a single  $\mu$ TFAD. This is achieved by printing 15 cycles of the reagent ink.

### **Microplate well test to identify assay component mixing incompatibility**

To identify pre-mixing incompatibility of the three assay components (ascorbic acid, phosphate buffer, nitroso-PSAP), mixtures of the following two components were initially added to microplate wells:

- (i) ascorbic acid, nitroso-PSAP
- (ii) pH 6.8 phosphate buffer, nitroso-PSAP
- (iii) ascorbic acid, pH 6.8 phosphate buffer

After overnight storage under dark and refrigerated condition (4°C), the residual relevant component and the Fe<sup>2+</sup> sample were added:

- (i) pH 6.8 phosphate buffer, (NH<sub>4</sub>)<sub>2</sub>Fe(SO<sub>4</sub>)<sub>2</sub>·6H<sub>2</sub>O
- (ii) ascorbic acid, (NH<sub>4</sub>)<sub>2</sub>Fe(SO<sub>4</sub>)<sub>2</sub>·6H<sub>2</sub>O
- (iii) nitroso-PSAP, (NH<sub>4</sub>)<sub>2</sub>Fe(SO<sub>4</sub>)<sub>2</sub>·6H<sub>2</sub>O

200 μL of the final resulting mixture composed of ascorbic acid (4 mM), pH 6.8 phosphate buffer (10 mM), nitroso-PSAP (1 mM), and Fe<sup>2+</sup> (0, 1, 2, 4, 6, 10 μM) was transferred to a separate microplate well and absorbance spectra were immediately acquired by the microplate reader. The results are shown in Figs. S5a, 5b, 5c for conditions (i), (ii), (iii), respectively.

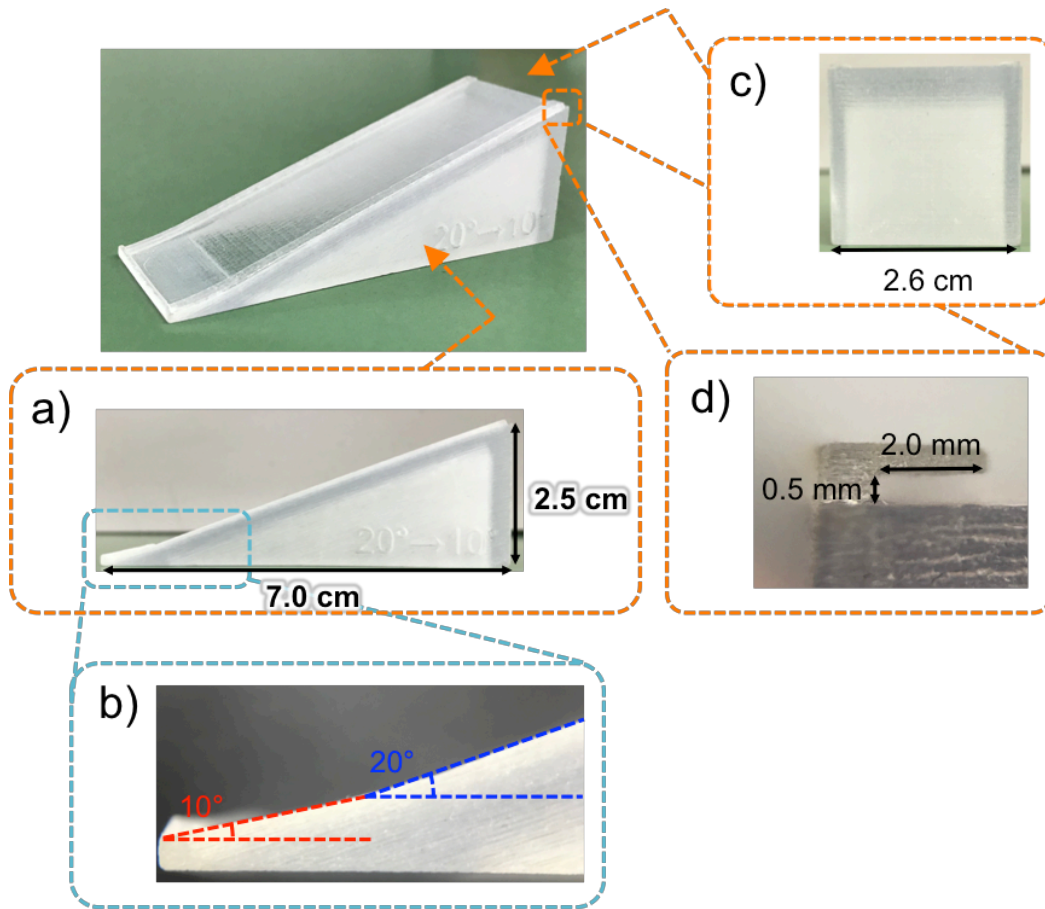

**Figure S1:** Schematic outline of 3D-printed inclination stand: a) a side view; b) a 10-degree slope and 20-degree slope at the bottom part; c) back face; d) slot on the edge for device fixation.

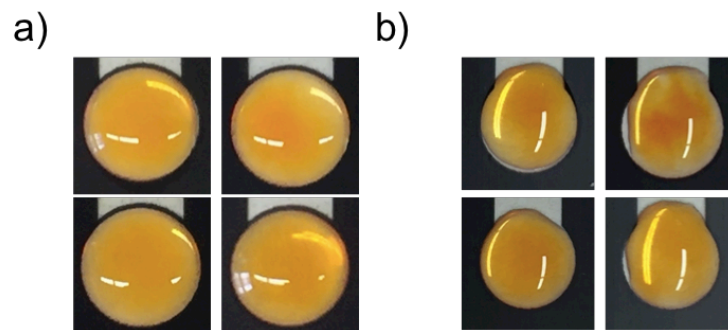

**Figure S2:** Optimization of the sensing area. Photographs of the sample droplet in the sensing area a) surrounded by a circular wax barrier (0.05 mm width); b) without the circular wax barrier. Each result was obtained from four independent experiments. The sample droplet only formed reproducible circular shapes in the presence of the wax barrier in front of the sensing area.

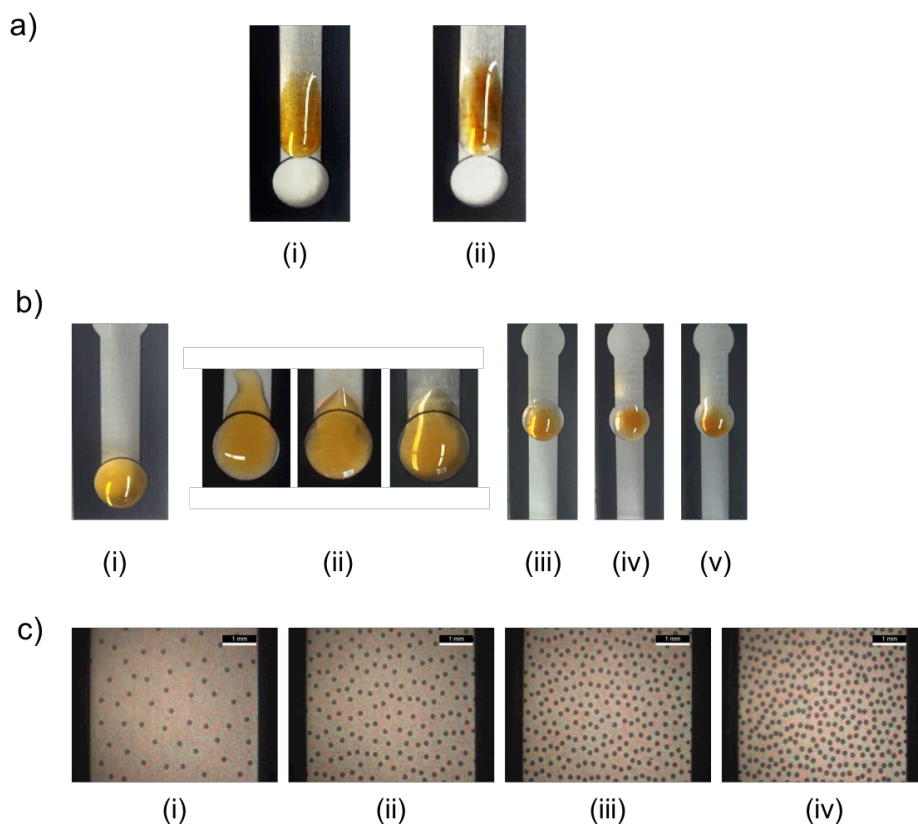

**Figure S3:** Optimization of wax dot printing between the 3rd area and the sensing area: a) Photographs visually showing the distribution of reagents in the case of (i) wax dots printed at 1% printing opacity setting (uniform mixing of the reagents in the sample droplet); (ii) absence of wax dots (incomplete mixing of the reagents in the sample droplet). b) Photographs after sample application to devices with various printing opacity settings: (i) 1% opacity (formation of hemispherical sample droplet in the sensing area); (ii) no opacity (*i.e.* droplet distortion, incomplete entrance of sample into the sensing area); (iii) 3% opacity; (iv) 5% opacity; (v) 7% opacity (retention of sample in the 3rd area due to excessive flow resistance at  $\geq 3\%$  opacity). c) Microscope pictures of wax dot-modified channel sections with various printing opacity settings: (i) 1% opacity; (ii) 3% opacity; (iii) 5% opacity; (iv) 7% opacity (scale bars: 1 mm). Contrast and brightness have been modified for the sake of visibility in part a and parts b (iii), (iv) and (v).

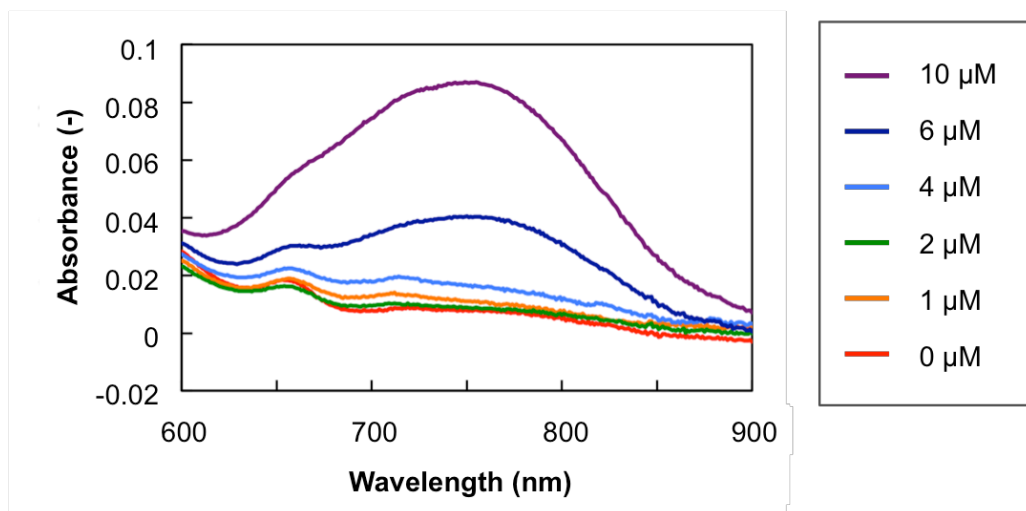

**Figure S4:** Absorbance spectra obtained from spot tests on an OHP film. A small peak/shoulder not attributed to the metal-nitroso-PSAP complex is observed around 650 nm.



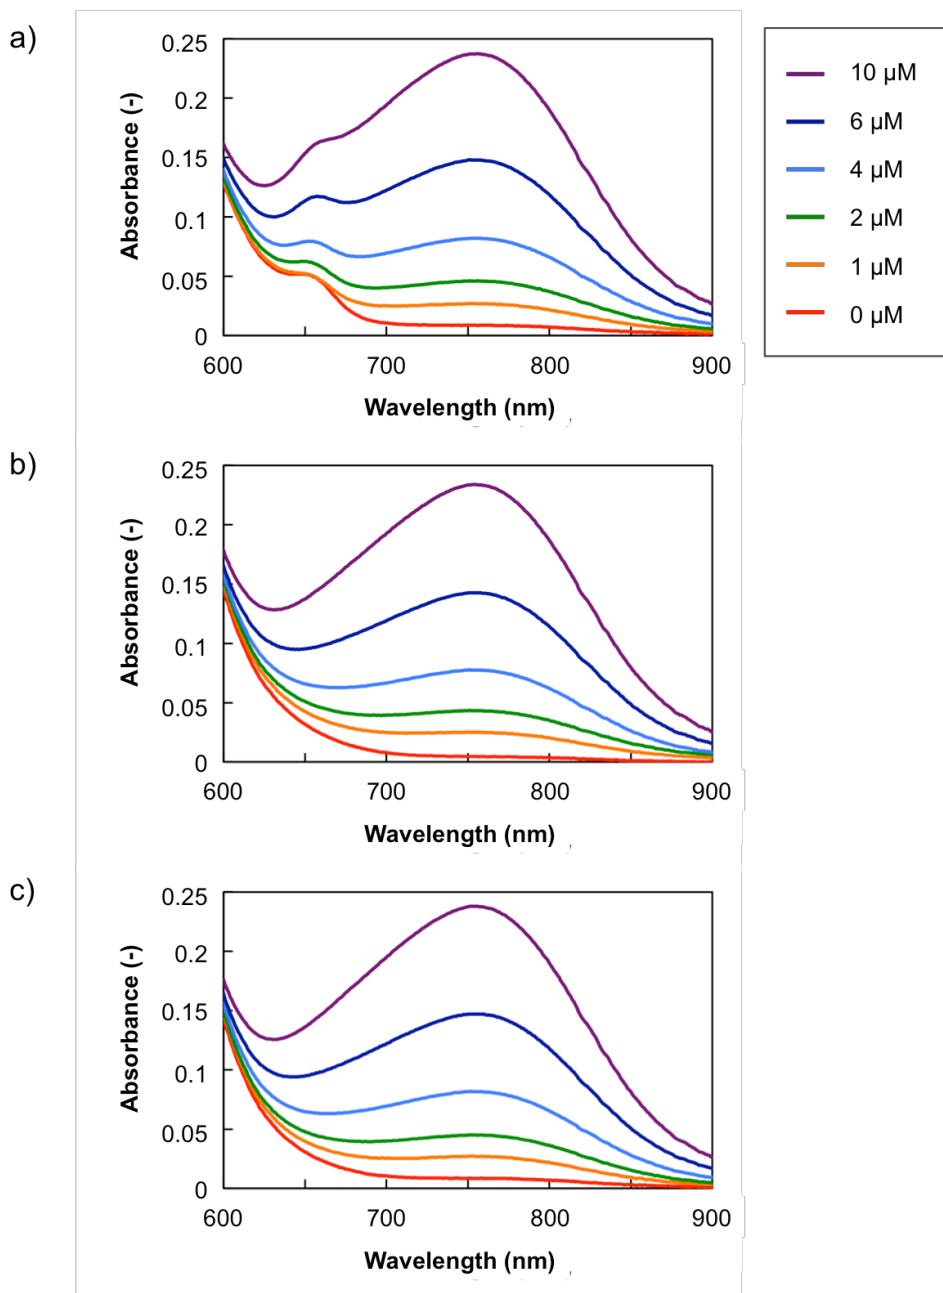

**Figure S5:** Absorbance spectra of  $\text{Fe}^{2+}$ -nitroso-PSAP complexes obtained under different reagent pre-mixing conditions in a 96-well microplate: a) ascorbic acid and nitroso-PSAP pre-mixed (condition (i) on page S4); b) phosphate buffer and nitroso-PSAP pre-mixed (condition (ii) on page S4); c) ascorbic acid and phosphate buffer pre-mixed (condition (iii) on page S4).

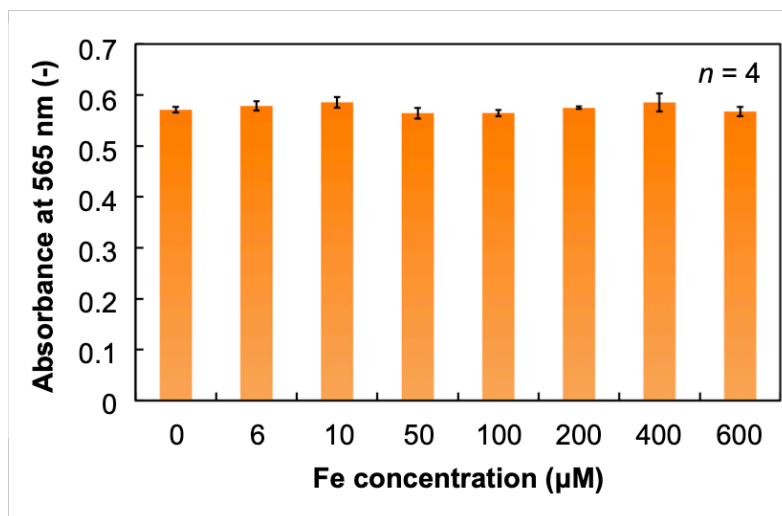

**Figure S6:** Iron concentration-dependent absorbance of acid red 22 at 565 nm on reagent-free  $\mu\text{TFADs}$ ; each data point has been obtained by measurements with 4 individual single-use devices; error bars indicate the standard deviations.

### **96-Well microplate test to estimate the limit of detection (LOD) for iron ions based on $3\sigma$ method**

To estimate the LOD of the iron ion assay on a microplate, reagents ( $(\text{NH}_4)_2\text{Fe}(\text{SO}_4)_2 \cdot 6\text{H}_2\text{O}$ , ascorbic acid, phosphate buffer and nitroso-PSAP) were added to the microplate wells in the order shown below:

- (i)  $(\text{NH}_4)_2\text{Fe}(\text{SO}_4)_2 \cdot 6\text{H}_2\text{O}$
- (ii) ascorbic acid
- (iii) pH 6.8 phosphate buffer
- (iv) nitroso-PSAP

This order corresponds to the order of reagent dissolution in the case of the flow-based  $\mu\text{TFAD}$  assay. 50  $\mu\text{L}$  of the final resulting mixture composed of ascorbic acid (4 mM), pH 6.8 phosphate buffer (10 mM), nitroso-PSAP (1 mM), and  $\text{Fe}^{2+}$  (0, 1, 2, 4, 6, 10  $\mu\text{M}$ ) was transferred to a separate microplate well and absorbance at 756 nm was immediately acquired by the microplate reader. The result is shown in Fig. S7.

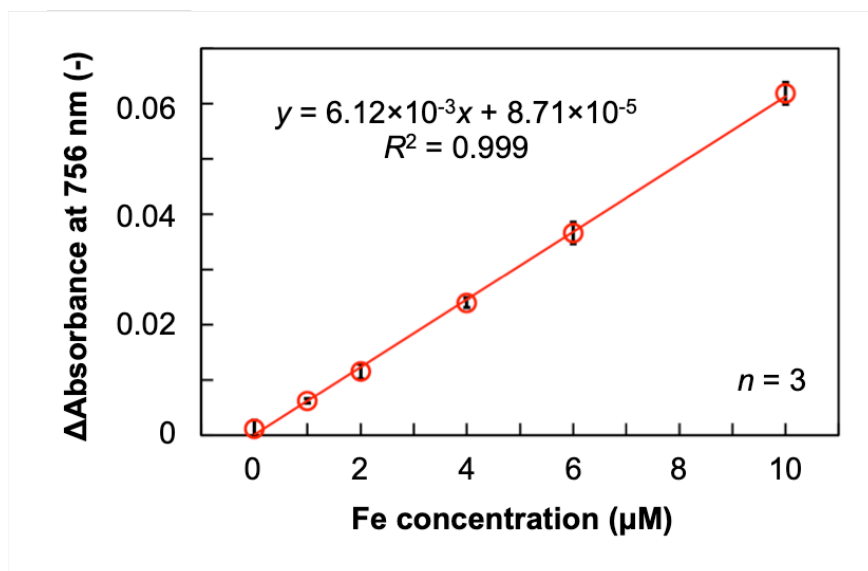

**Figure S7:** Calibration curve for 96-well microplate-based  $\text{Fe}^{2+}$  assay; error bars indicate standard deviations.

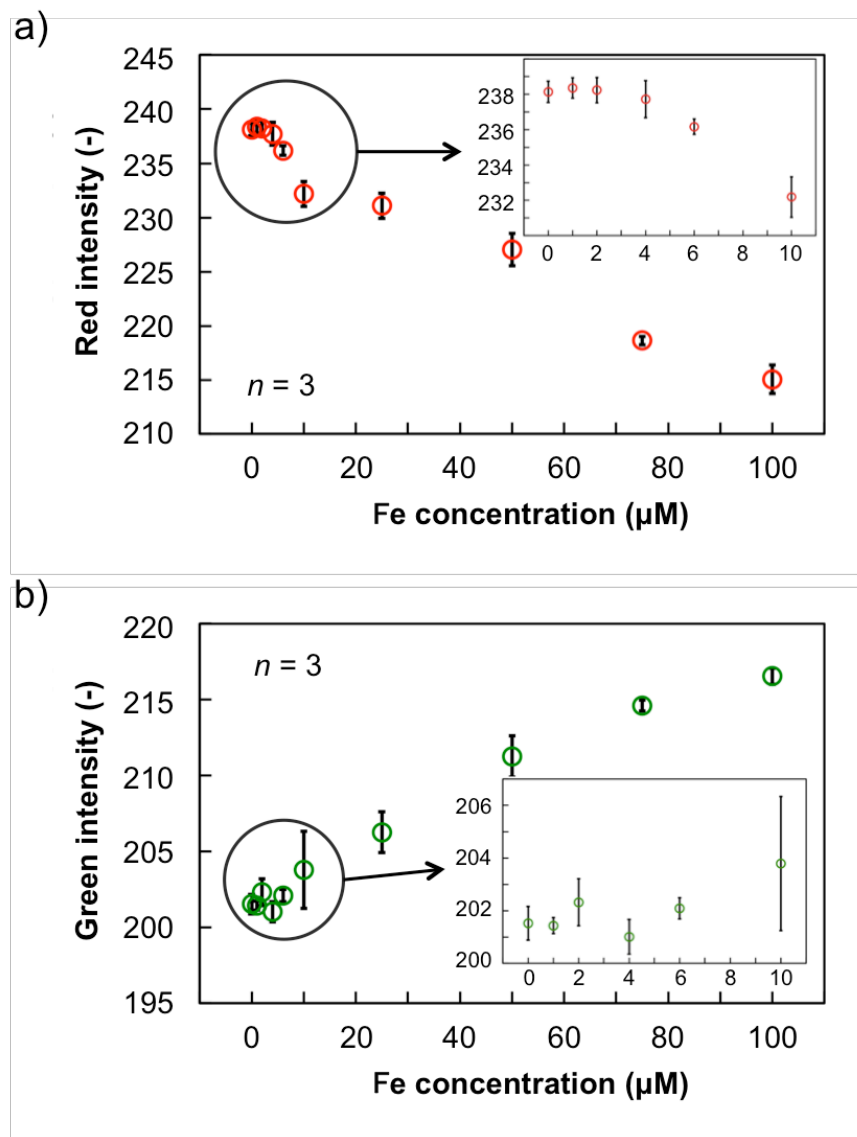

**Figure S8:** Sample iron concentration-dependent response on a paper substrate for a) red and b) green colour coordinates; each data point has been obtained by measurements with 3 individual single-use devices; error bars indicate the standard deviations.

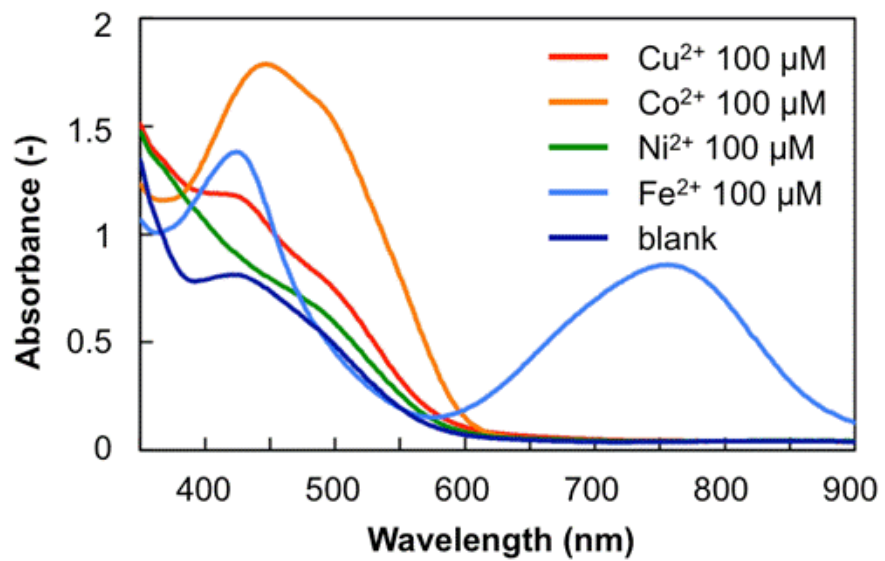

**Figure S9:** Original absorbance spectra of nitroso-PSAP in the presence of 100 μM of Cu<sup>2+</sup> (red), Co<sup>2+</sup> (yellow), Ni<sup>2+</sup> (green), Fe<sup>2+</sup> (aqua) and nitroso-PSAP alone (dark blue) acquired on the μTFADs.

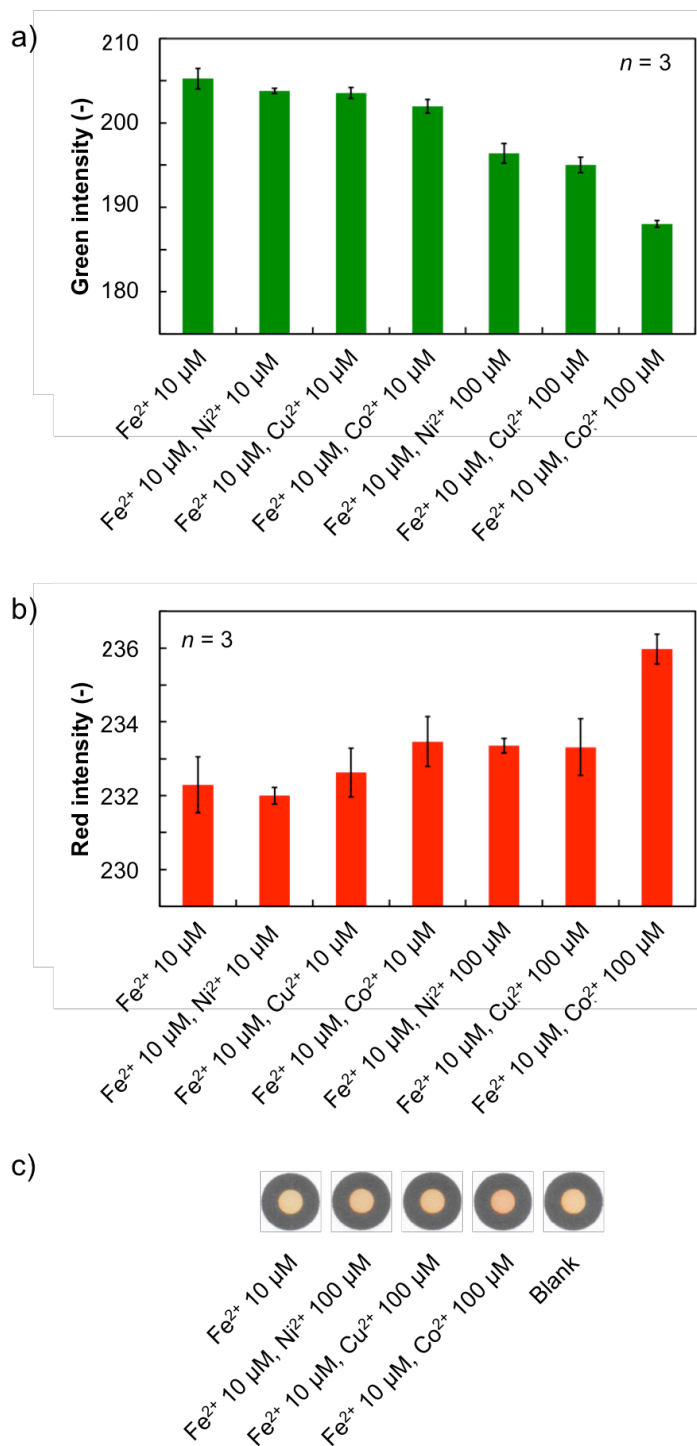

**Figure S10:** Interference of Cu<sup>2+</sup>, Co<sup>2+</sup> and Ni<sup>2+</sup> ions with the Fe<sup>2+</sup> assay based on the a) green and b) red colour intensity analysis of paper spots; each data point has been obtained by measurements

with 4 individual single-use devices; error bars indicate the standard deviations; c) Scanned images of nitroso-PSAP in the presence of 10  $\mu\text{M}$  of  $\text{Fe}^{2+}$  and 100  $\mu\text{M}$  of the interfering ions.
